# Supplementary material for: Scriptaid overcomes hypoxia-induced cisplatin resistance in both wild-type and mutant p53 lung cancer cells
Source: PubMed Central journal article supplement (PMC5342127; doi:10.18632/oncotarget.12378), 2016-09-30
Supplement: oncotarget-07-71841-s001.pdf [file oncotarget-07-71841-s001.pdf]

## Scriptaid overcomes hypoxia-induced cisplatin resistance in both wild-type and mutant p53 lung cancer cells

### Supplementary Materials

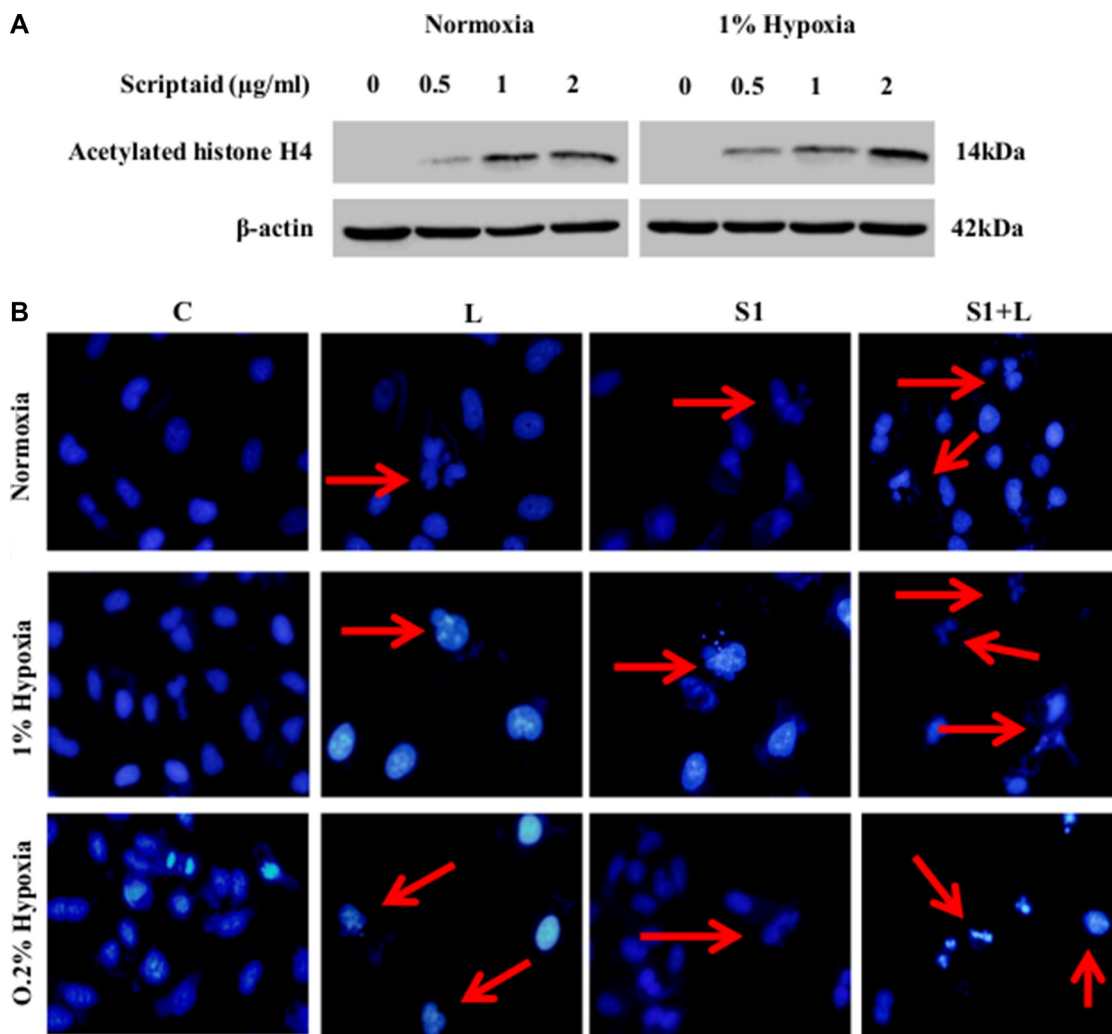

**Supplementary Figure S1:** (A) Western blot analysis showing up overexpression of acetylated histone H4 in response to scriptaid treatment in A549 cell line in a dose-dependent manner in normoxia and hypoxia. (B) DAPI stained nuclei showing morphological features of apoptotic cells in response to treatment. Arrows indicate blebs in the nucleus, a hallmark of cells undergoing apoptosis. Combination treated cells showed higher number of apoptosing cells.

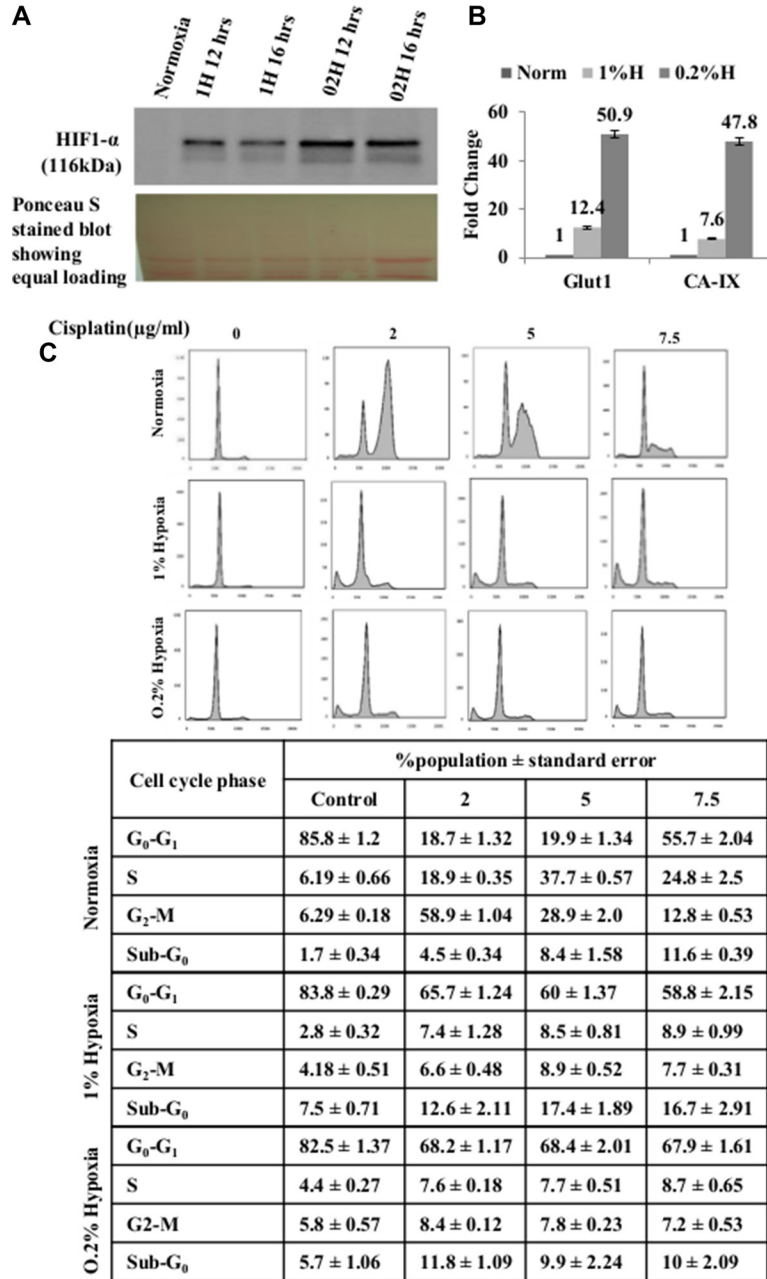

**Supplementary Figure S2: Confirmation of *in vitro* hypoxia by (A) western blot showing stabilization of hypoxia inducible factor (HIF) 1 $\alpha$  and up-regulation of HIF1 $\alpha$ -regulated genes (B) in A549. (C) Cell cycle analysis by flow cytometry showing G<sub>2</sub>-M and S phase arrest of A549 cells in response to cisplatin treatment in normoxia. Arrest was overcome in hypoxia accompanied by increase in G<sub>0</sub>-G<sub>1</sub> population.**

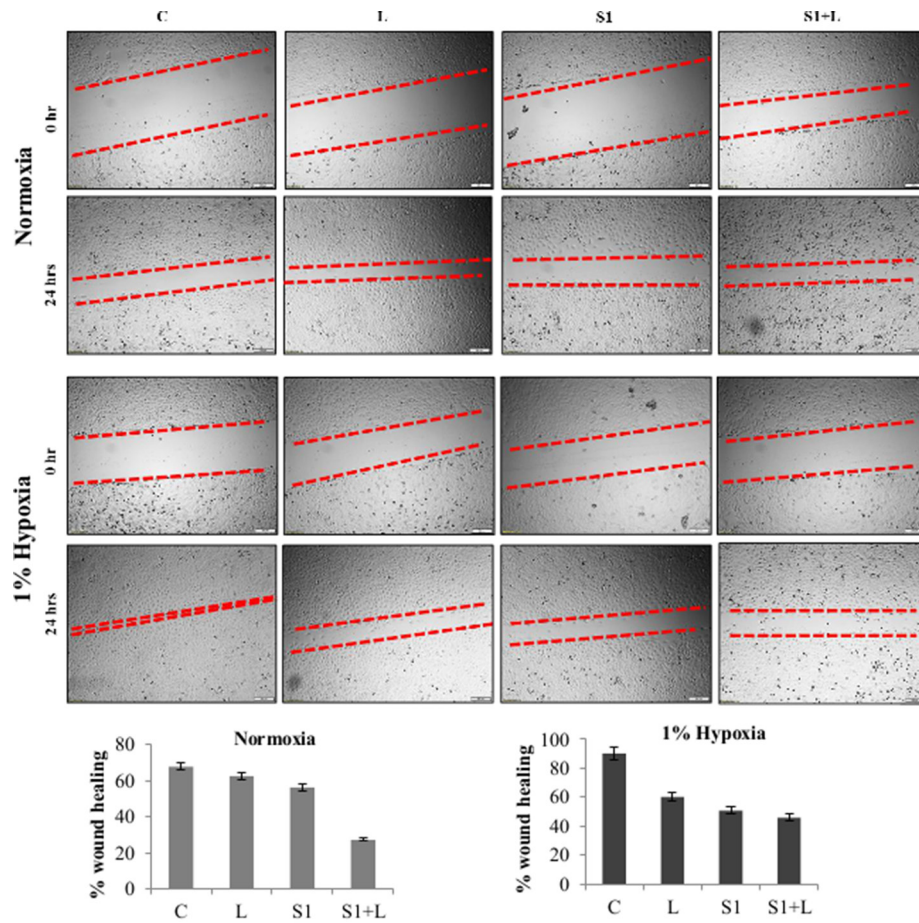

**Supplementary Figure S3: Wound healing assay showing inhibition of migration in response to treatment.** Compared to normoxia, A549 cells showed aggressive migratory potency under hypoxic condition in untreated controls. The combination treatment was inhibitory to cell migration in both conditions. C = control, L = 2 µg/ml cisplatin, S1 = 1 µg/ml scriptaid. C = control, L = 2 µg/ml cisplatin, S1 = 1 µg/ml scriptaid. \* indicates  $p < 0.05$ .

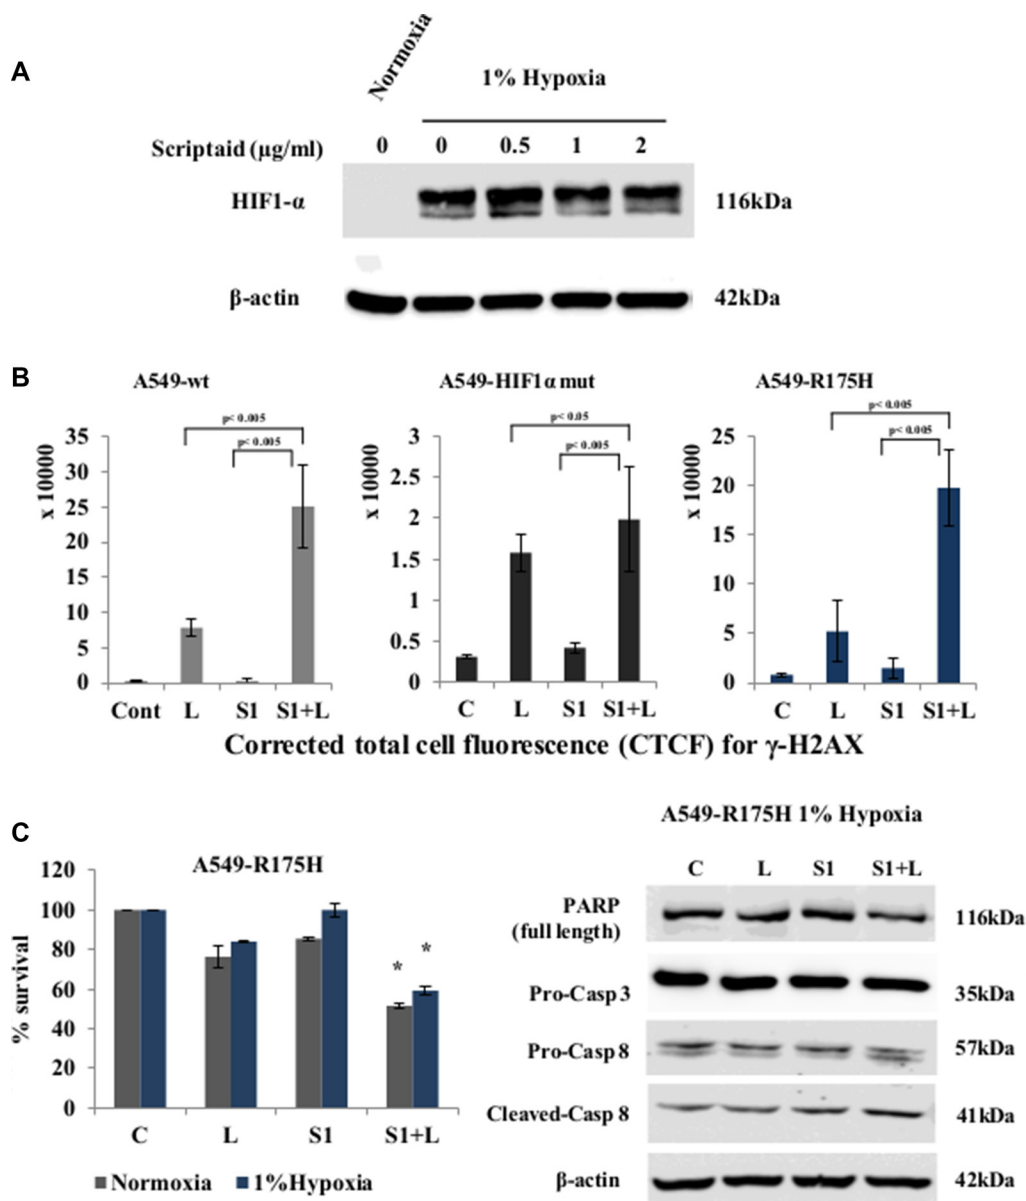

**Supplementary Figure S4:** (A) Western blot for HIF1 $\alpha$  shows no significant change in expression after 24 hrs treatment with various concentration of scriptaid in A549 cells.  $\beta$ -actin is used as the loading control. (B) CTCF for  $\gamma$ -H2AX was calculated using Image J software; in all 3 cell lines, the combination treatment resulted in significantly more DNA damage than single agent treatment. (C) MTT for single and combination in normoxia and hypoxia in A549-R175H cells showing effectiveness of the combination in both conditions; western blot for apoptosis markers in hypoxia for A549-R175H shows increased cell death in combination than that in single agent treatment. C = control, L = 2  $\mu$ g/ml cisplatin, S1 = 1  $\mu$ g/ml scriptaid. \* indicates  $p < 0.05$ .
